# Supplementary material for: Pentraxin-3 inhibits milky spots metastasis of gastric cancer by inhibiting M2 macrophage polarization
Source: PubMed Central journal article supplement (PMC8210545; doi:10.7150/jca.58698), 2021-06-04
Supplement: jcav12p4686s1.pdf [file jcav12p4686s1.pdf]

## Detailed clinic parameters

| Tissue code | Gender | Age | ASA | Stage | T | N | Operation date | Pathological type | Distant tumor metastasis |
|-------------|--------|-----|-----|-------|---|---|----------------|-------------------|--------------------------|
| D09A1007    | Male   | 65  | 1   | II    | 2 | 1 | 2012/5/8       | Adenocarcinoma    | No                       |
| D09A1095    | Male   | 55  | 2   | II    | 1 | 2 | 2012/6/28      | Adenocarcinoma    | No                       |
| D09A1109    | Female | 71  | 1   | I     | 1 | 1 | 2006/10/19     | Adenocarcinoma    | No                       |
| D09A1528    | Female | 44  | 1   | II    | 2 | 1 | 2009/12/16     | Adenocarcinoma    | No                       |
| D09A1592    | Male   | 58  | 1   | I     | 1 | 1 | 2006/4/3       | Adenocarcinoma    | No                       |
| D09A1613    | Male   | 53  | 1   | I     | 1 | 0 | 2006/4/4       | Adenocarcinoma    | No                       |
| D09A1738    | Male   | 55  | 2   | I     | 1 | 1 | 2012/6/28      | Adenocarcinoma    | No                       |
| D09A1849    | Female | 54  | 2   | II    | 3 | 1 | 2006/11/29     | Adenocarcinoma    | No                       |
| D09A1854    | Male   | 55  | 1   | I     | 1 | 0 | 2005/9/19      | Adenocarcinoma    | No                       |
| D09A1869    | Male   | 51  | 1   | II    | 2 | 1 | 2006/5/8       | Adenocarcinoma    | No                       |
| D09A1911    | Male   | 63  | 1   | I     | 1 | 0 | 2007/11/27     | Adenocarcinoma    | No                       |
| D09A2053    | Female | 63  | 2   | II    | 1 | 2 | 2007/4/5       | Adenocarcinoma    | No                       |
| D09A2429    | Female | 50  | 1   | II    | 3 | 1 | 2006/10/11     | Adenocarcinoma    | No                       |
| 4101A5 005  | Female | 30  | 1   | I     | 1 | 0 | 2006/4/25      | Adenocarcinoma    | No                       |
| 4101A5 007  | Male   | 66  | 2   | I     | 1 | 2 | 2006/10/19     | Adenocarcinoma    | No                       |
| D09A3962    | Male   | 73  | 1   | II    | 2 | 1 | 2006/10/10     | Adenocarcinoma    | No                       |
| D09A4016    | Female | 51  | 1   | II    | 1 | 2 | 2011/4/17      | Adenocarcinoma    | No                       |
| 3601B2 013  | Female | 62  | 2   | II    | 1 | 2 | 2005/11/21     | Adenocarcinoma    | No                       |
| D09A1618    | Male   | 63  | 1   | I     | 1 | 1 | 2011/5/12      | Adenocarcinoma    | No                       |
| 3601B2 012  | Male   | 42  | 1   | I     | 1 | 1 | 2007/3/21      | Adenocarcinoma    | No                       |
| 3205A3 005  | Male   | 36  | 1   | I     | 1 | 1 | 2005/9/23      | Adenocarcinoma    | No                       |
| 3205A3 006  | Female | 63  | 2   | I     | 1 | 0 | 2007/4/5       | Adenocarcinoma    | No                       |
| D09A1092    | Male   | 54  | 1   | I     | 1 | 0 | 2009/10/19     | Adenocarcinoma    | No                       |
| D09A1609    | Female | 50  | 1   | II    | 3 | 1 | 2006/10/11     | Adenocarcinoma    | No                       |
| D09A1621    | Male   | 62  | 2   | II    | 1 | 2 | 2011/9/26      | Adenocarcinoma    | No                       |
| D09A1612    | Male   | 75  | 2   | II    | 3 | 0 | 2005/10/12     | Adenocarcinoma    | No                       |
| D09A1702    | Male   | 55  | 1   | I     | 1 | 1 | 2007/3/21      | Adenocarcinoma    | No                       |
| D09A1878    | Male   | 53  | 1   | I     | 2 | 0 | 2006/4/4       | Adenocarcinoma    | No                       |
| D09A1925    | Male   | 64  | 1   | I     | 1 | 1 | 2009/12/16     | Adenocarcinoma    | No                       |

|            |        |    |   |    |   |   |            |                |    |
|------------|--------|----|---|----|---|---|------------|----------------|----|
| D09A2051   | Female | 30 | 1 | II | 1 | 2 | 2006/4/25  | Adenocarcinoma | No |
| D09A2411   | Male   | 70 | 1 | I  | 1 | 0 | 2006/11/16 | Adenocarcinoma | No |
| D09A2432   | Female | 55 | 1 | II | 2 | 2 | 2010/9/26  | Adenocarcinoma | No |
| D09A2468   | Female | 70 | 1 | II | 3 | 1 | 2007/3/12  | Adenocarcinoma | No |
| D09A2472   | Female | 64 | 2 | I  | 1 | 1 | 2006/10/8  | Adenocarcinoma | No |
| 3205A3 007 | Female | 55 | 1 | II | 3 | 1 | 2010/4/5   | Adenocarcinoma | No |
| 3701A9 002 | Male   | 72 | 2 | I  | 1 | 1 | 2006/10/11 | Adenocarcinoma | No |
| D09A1411   | Female | 59 | 2 | II | 2 | 2 | 2011/6/16  | Adenocarcinoma | No |
| D09A1917   | Male   | 63 | 1 | II | 1 | 2 | 2011/5/12  | Adenocarcinoma | No |
| D09A1937   | Male   | 65 | 2 | II | 3 | 1 | 2005/10/12 | Adenocarcinoma | No |
| D09A1953   | Male   | 63 | 2 | I  | 1 | 1 | 2012/5/4   | Adenocarcinoma | No |
| D09A6065   | Male   | 60 | 2 | I  | 1 | 1 | 2006/7/26  | Adenocarcinoma | No |
| D09A6059   | Female | 55 | 2 | II | 2 | 2 | 2012/4/17  | Adenocarcinoma | No |
| D09A1155   | Male   | 60 | 1 | I  | 1 | 1 | 2011/6/24  | Adenocarcinoma | No |
| D09A2047   | Male   | 64 | 1 | I  | 1 | 1 | 2010/4/12  | Adenocarcinoma | No |
| D09A2056   | Male   | 58 | 1 | II | 1 | 2 | 2011/10/12 | Adenocarcinoma | No |
| D09A2393   | Male   | 62 | 1 | I  | 1 | 1 | 2006/4/3   | Adenocarcinoma | No |
| D09A2399   | Female | 77 | 1 | II | 3 | 1 | 2007/3/12  | Adenocarcinoma | No |
| D09A2413   | Female | 62 | 2 | I  | 1 | 1 | 2005/11/21 | Adenocarcinoma | No |
| D09A0969   | Female | 33 | 1 | II | 1 | 2 | 2010/4/15  | Adenocarcinoma | No |
| D09A1620   | Male   | 63 | 1 | II | 1 | 2 | 2011/10/12 | Adenocarcinoma | No |
| D09A1861   | Male   | 66 | 2 | II | 2 | 2 | 2006/10/19 | Adenocarcinoma | No |
| D09A1003   | Female | 59 | 2 | II | 1 | 2 | 2011/6/16  | Adenocarcinoma | No |
| D09A6063   | Male   | 71 | 2 | I  | 1 | 1 | 2006/4/10  | Adenocarcinoma | No |
| D09A1410   | Male   | 65 | 2 | I  | 1 | 1 | 2010/4/12  | Adenocarcinoma | No |
| D09A1436   | Female | 55 | 2 | I  | 1 | 1 | 2012/4/17  | Adenocarcinoma | No |
| D09A1627   | Male   | 63 | 1 | I  | 1 | 1 | 2011/10/12 | Adenocarcinoma | No |
| D09A1628   | Male   | 60 | 2 | II | 2 | 1 | 2006/7/26  | Adenocarcinoma | No |
| D09A6058   | Male   | 64 | 1 | I  | 1 | 1 | 2010/4/12  | Adenocarcinoma | No |
| D09A2277   | Male   | 58 | 1 | I  | 1 | 1 | 2012/1/11  | Adenocarcinoma | No |
| D09A2465   | Male   | 43 | 2 | II | 3 | 0 | 2010/4/15  | Adenocarcinoma | No |
